# Supplementary material
Source: Springer Nature journal article supplement (https://www.springermedizin.de/resource/supplementary/12875_2014_1078_MOESM1_ESM.pdf/9435766)
Supplement: MOESM1 [file 9435766]

**85** practices contacted

26%

**22** practices recruited

**979** patients with oral anticoagulation identified

84%

16%

**822** eligible patients were identified

70%

30%

**572** participants were contacted

60%

40%

**345** patients included in the study and analysis

**149** patients excluded: nursing home residents, inadequate language proficiency, inability to give informed consent

**250** patients could not be contacted

**205** patients or caring relatives refused to participate or excluded  
**22** relatives participated
